# Supplementary material for: Machine learning-based endoplasmic reticulum-related diagnostic biomarker and immune microenvironment landscape for osteoarthritis
Source: Aging (Albany NY). 2024 Feb 28;16(5):4563–78. doi: 10.18632/aging.205611 (PMC10968715; doi:10.18632/aging.205611)
Supplement: Supplementary Table 1 [file aging-16-205611-s001.xlsx]

## Sheet: Sheet1
Supplementary Table 1. The gene list of ERRGs related genes signature.
The gene list of ERRGs
ERN1
HSPA5
ATP2A2
ATP2A1
ERGIC1
ATP2A3
ERP44
ERP29
KDELR1
ERAP1
ERO1A
KDELR2
OS9
ERAP2
KDELR3
SERP1
ERLEC1
ERO1B
ERN2
SEC16A
RER1
ERP27
SERP2
EIF2AK3
HERPUD1
XBP1
CHERP
ERMP1
SEC16B
VCP
CALR
CANX
ATF6
HSP90B1
PDIA3
DDIT3
TXNDC12
LMAN1
SYVN1
RYR1
LNPK
CASQ1
DERL1
P4HB
TXNDC5
SEC23A
DERL2
AMFR
NFE2L1
DNAJC10
ATF4
SIL1
MAN1B1
PDIA4
JSRP1
STIM1
BCAP31
DNAJB9
FKBP14
ERGIC3
BCL2
H6PD
ITPR1
EIF2S1
ATP13A1
PSEN1
STING1
MIA3
APP
DERL3
RTN4
EPM2A
DNAJB11
DNAJC3
YIPF5
CASP4
LMAN2
MIA2
STX17
BAG6
SURF4
CKAP4
SEL1L
EDEM1
TMED2
HYOU1
SEC31A
STX5
SEC61A1
INSIG1
SEC24A
ERLIN2
SEC61B
WFS1
SELENOS
ESYT1
VAPA
RPN1
SEC13
VAPB
ARL6IP1
GET3
SREBF1
SEC24B
SCAP
TMEM33
PDIA2
ERGIC2
PPP1R15A
RRBP1
ERLIN1
ATL3
SLC35B1
INSIG2
UFL1
TAPBP
RAB1B
PLN
CREB3
ATF6B
CFTR
NHLRC1
CCDC47
P4HTM
ESYT2
SAR1B
STIM2
TMED4
CISD2
SREBF2
RYR2
PDIA6
RSAD2
HERPUD2
PTPN1
BSCL2
UGGT1
ALG1
MANF
RTN3
ATL2
FOXRED2
SIGMAR1
SEC61G
TAP1
RAB1A
SRP54
ATL1
CNIH4
TP53
DDRGK1
GET4
TRAM1
PPIB
RNF139
TMED10
SEC22B
UBL4A
SEC24C
ORAI1
SEC63
TRIP11
TMBIM6
BNIP1
PSEN2
SLN
TMCC1
CASP3
UBE2J2
GBF1
SEC62
UBE2J1
ESYT3
TFG
PREB
DDOST
COPB1
EDEM3
SARAF
TEX264
EDEM2
SAR1A
ASPH
SEC24D
RNF185
UGGT2
CREB3L1
PRKN
TMED9
OSBPL8
TMED7
HMGCR
LMAN2L
ZDHHC6
BAX
RCN2
GET1
TAP2
RPN2
PDZD8
TMED3
STARD3
PDCD6
STX18
EMC10
RTN1
SLC37A4
YIF1A
UBC
REEP5
